# Supplementary material
Source: PubMed Central journal article supplement (PMC4852158)
Supplement: NIHMS752249-supplement-Supplemental.pdf [file NIHMS752249-supplement-Supplemental.pdf]

## Supplementary Material

### **Layer-by-Layer Inorganic/Polymeric Nanoparticles for Kinetically Controlled Multi-gene Delivery**

Corey J. Bishop<sup>†</sup>, Allen L. Liu<sup>†</sup>, David S. Lee<sup>†</sup>, Richard J. Murdock<sup>†</sup>, Jordan J. Green<sup>†,‡,#,\*</sup>

<sup>†</sup>Department of Biomedical Engineering  
Johns Hopkins University School of Medicine  
Translational Tissue Engineering Center  
400 North Broadway Rm 5017  
Baltimore, MD 21231, USA  
Corey J. Bishop: cbishop9@jhmi.edu

<sup>‡</sup>Departments of Ophthalmology, Oncology, and Neurosurgery  
Johns Hopkins University School of Medicine  
400 North Broadway Rm 5017  
Baltimore, MD 21231, USA

<sup>#</sup>Department of Materials Science and Engineering  
Johns Hopkins University  
400 North Broadway Rm 5017  
Baltimore, MD 21231, USA

\*Corresponding author: Dr. Jordan J. Green  
400 North Broadway Rm 5017  
Baltimore, MD 21231, USA  
410-614-9113 / FAX 443-287-6298  
E-mail: green@jhu.edu

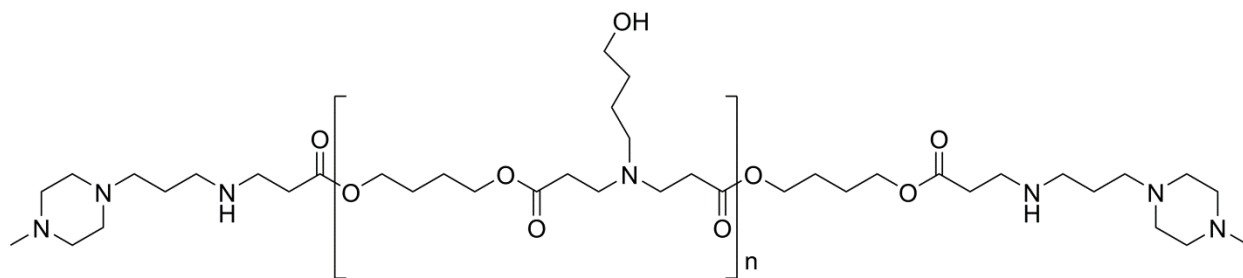

**Figure S1.** Polymer structure of B4-S4-E7 (447).

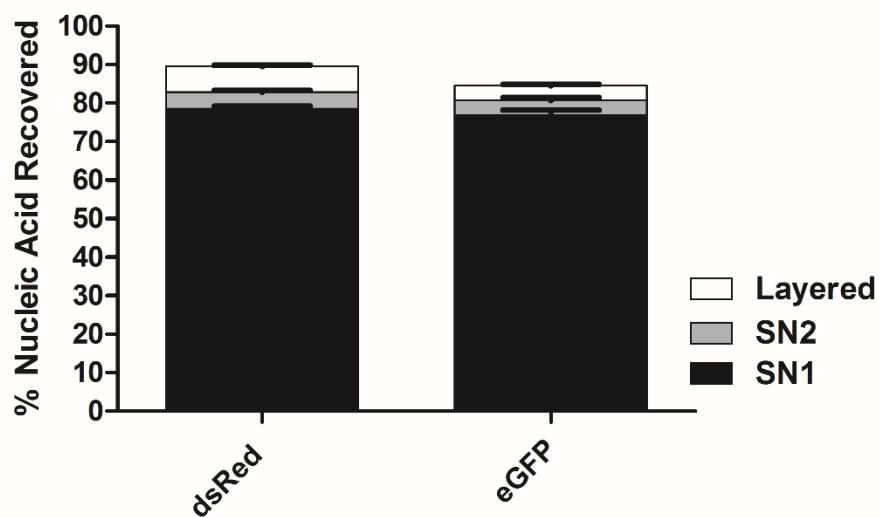

**Figure S2.** Layered nucleic acid content of the inner (dsRed) and outer (eGFP) pDNA layers.

Nucleic acid content in the supernatant of the first and second washings (SN1 and SN2) after the nucleic acid layer incubation.

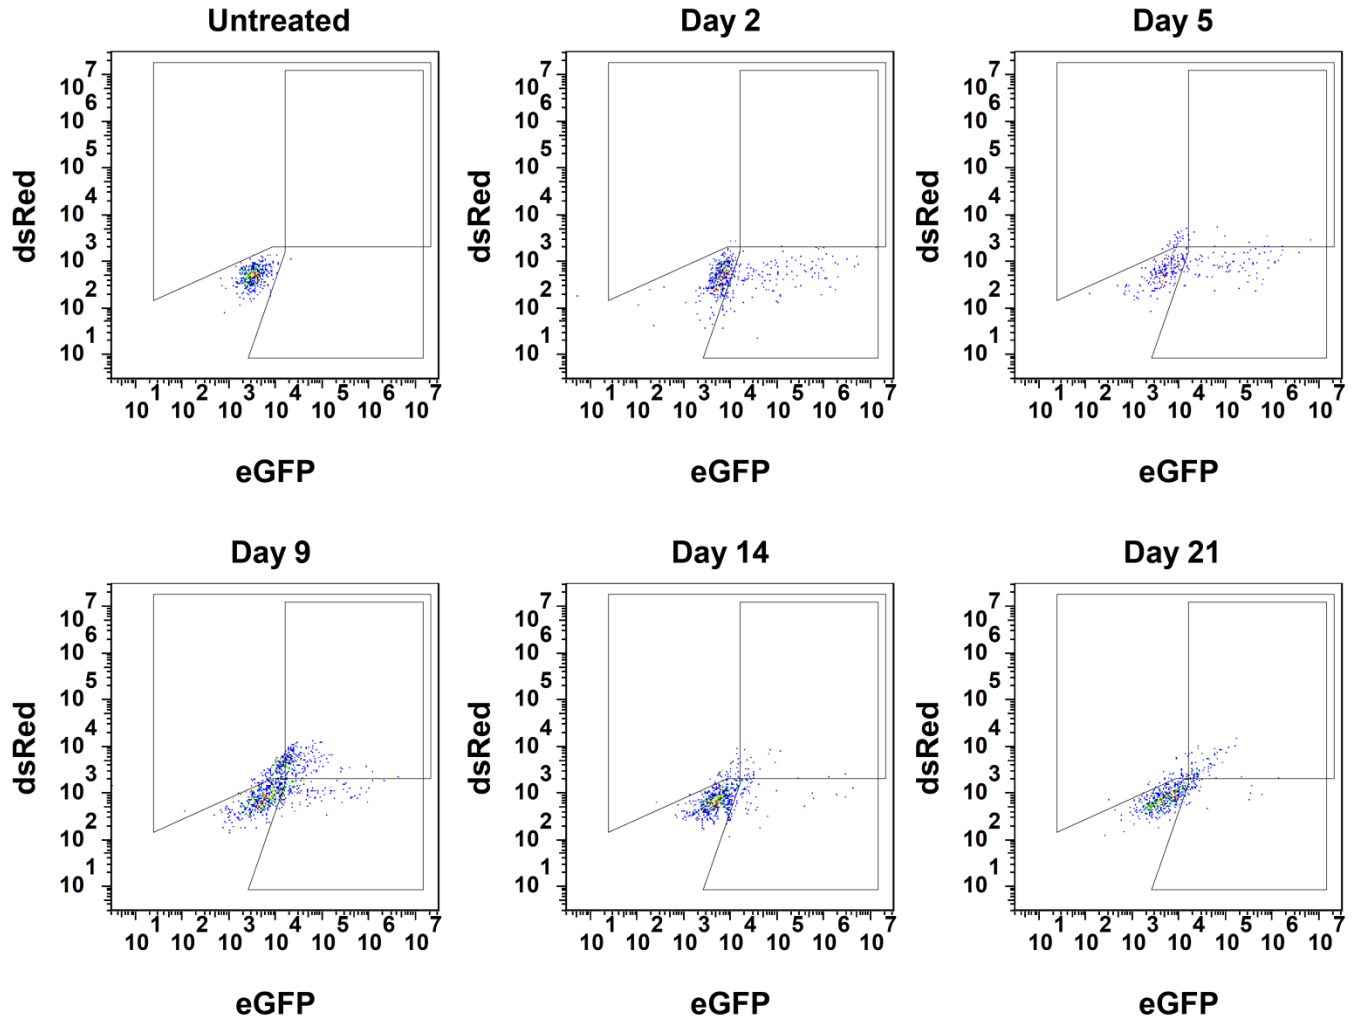

**Figure S3.** The flow cytometry dot plots of the eGFP and dsRed channels over time during the transfection of GB319 cells in 10% serum containing media with LbL inorganic/polymeric nanoparticles. The data demonstrates the expression maxima of the outer (eGFP) and inner (dsRed) pDNA layers to be on days 2 and 9, respectively.

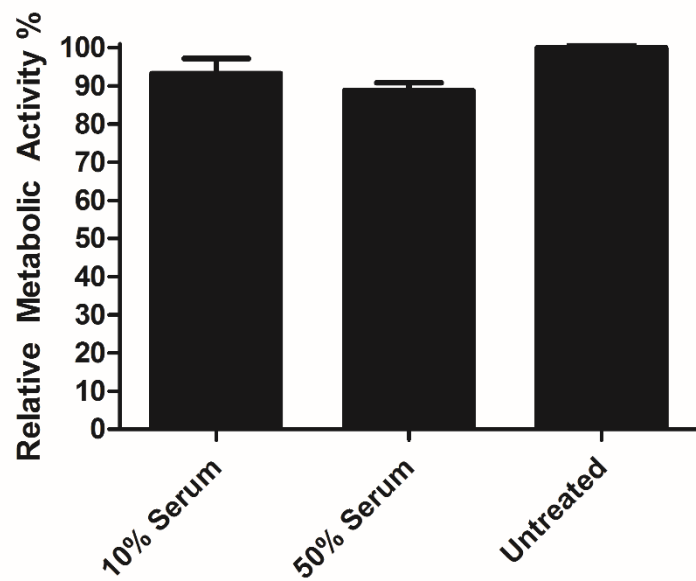

**Figure S4.** The relative metabolic activities of GB319 cells incubated with LbL inorganic/polymeric nanoparticles in either 10% or 50% serum.

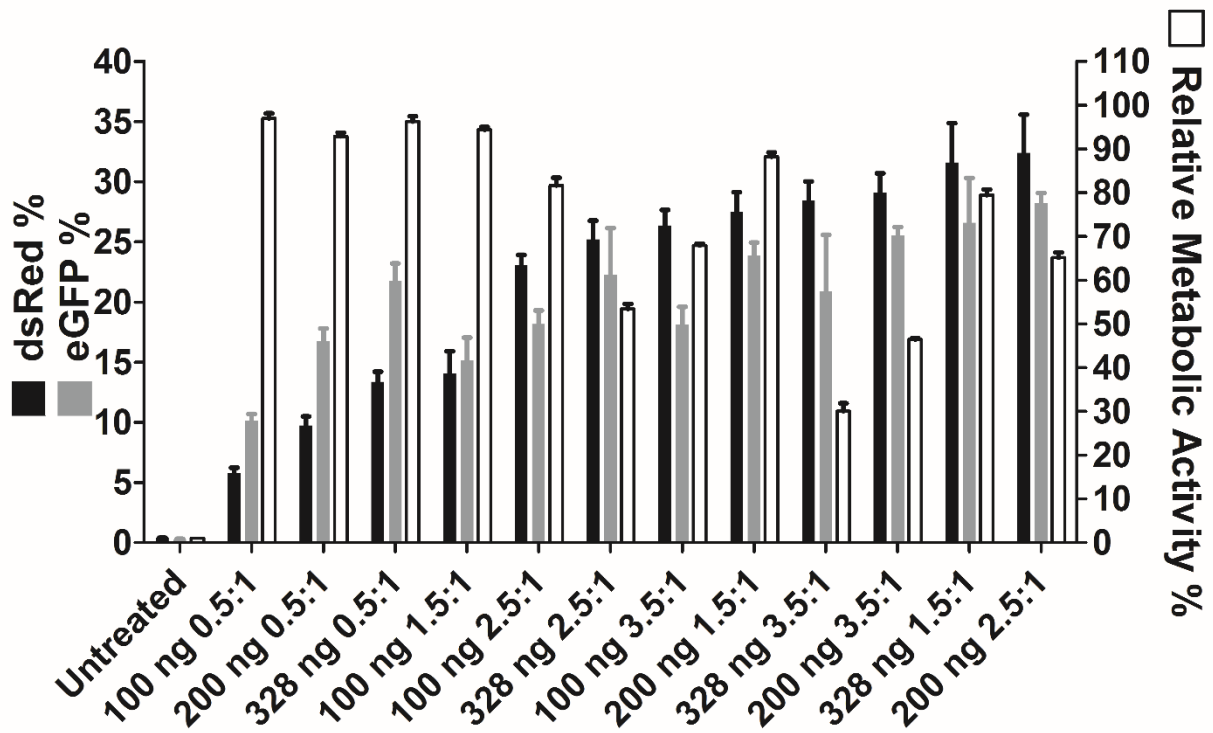

**Figure S5.** dsRed and eGFP expression efficacies of Lipo2k dosages at 100, 200, or 328 ng DNA (same dsRed:eGFP pDNA ratio) at varying Lipo2k  $\mu$ L:pDNA  $\mu$ g ratios.
